# Supplementary material for: Effectiveness of a Novel HIV Self-Testing Service with Online Real-Time Counseling Support (HIVST-Online) in Increasing HIV Testing Rate and Repeated HIV Testing among Men Who Have Sex with Men in Hong Kong: Results of a Pilot Implementation Project
Source: PubMed Central journal article supplement (PMC7830557; doi:10.3390/ijerph18020729), 2021-01-15
Supplement: ijerph-18-00729-s001.pdf [file ijerph-18-00729-s001.pdf]

**Table S1.** Comparing baseline characteristics of participants who completed the follow-up evaluation at Month 6 versus those who were lost to follow-up.

|                                           | New-users of HIVST-online            |                          |         | Ever-users of HIVST-online           |                          |         |
|-------------------------------------------|--------------------------------------|--------------------------|---------|--------------------------------------|--------------------------|---------|
|                                           | Being followed up at Month 6 (n=191) | Loss-to-follow-up (n=37) | P value | Being followed up at Month 6 (n=107) | Loss-to-follow-up (n=15) | P value |
|                                           | %                                    | %                        |         | %                                    | %                        |         |
| <b>Socio-demographic characteristics</b>  |                                      |                          |         |                                      |                          |         |
| Age group                                 |                                      |                          |         |                                      |                          |         |
| 18-30                                     | 56.0                                 | 45.9                     |         | 58.9                                 | 86.7                     |         |
| 31-40                                     | 33.0                                 | 43.2                     |         | 27.1                                 | 13.3                     |         |
| >40                                       | 11.0                                 | 10.8                     | .47     | 14.0                                 | 0                        | .10     |
| Marital/cohabitation status               |                                      |                          |         |                                      |                          |         |
| Currently single                          | 80.6                                 | 73.0                     |         | 89.7                                 | 93.3                     |         |
| Cohabitate/married with a man             | 19.4                                 | 27.0                     |         | 9.3                                  | 6.7                      |         |
| Cohabitate/married with a woman           | 0                                    | 0                        | .29     | 0.9                                  | 0                        | .88     |
| Education level                           |                                      |                          |         |                                      |                          |         |
| Secondary or below                        | 12.0                                 | 16.2                     |         | 15.9                                 | 6.7                      |         |
| University or above                       | 88.0                                 | 83.8                     | .49     | 84.1                                 | 93.3                     | .35     |
| Employment status                         |                                      |                          |         |                                      |                          |         |
| Full-time                                 | 87.4                                 | 78.4                     |         | 82.2                                 | 73.3                     |         |
| Part-time/<br>unemployed/retired/student  | 12.6                                 | 21.6                     | .15     | 17.8                                 | 26.7                     | .41     |
| Sexual orientation                        |                                      |                          |         |                                      |                          |         |
| Gay                                       | 93.7                                 | 91.9                     |         | 92.5                                 | 93.3                     |         |
| Bisexual                                  | 5.2                                  | 8.1                      |         | 7.5                                  | 6.7                      |         |
| Heterosexual                              | 1.0                                  | 0                        | .66     | 0                                    | 0                        | .91     |
| History of sexually transmitted infection |                                      |                          |         |                                      |                          |         |
| No                                        | 73.3                                 | 78.4                     |         | 87.9                                 | 86.7                     |         |
| Yes                                       | 26.2                                 | 21.6                     | .55     | 12.1                                 | 13.3                     | .90     |
| <b>HIV testing history</b>                |                                      |                          |         |                                      |                          |         |

|                                                                                                    |         |         |     |         |         |  |     |
|----------------------------------------------------------------------------------------------------|---------|---------|-----|---------|---------|--|-----|
| Number of HIV testing in the past three years in addition to HIVST-online                          |         |         |     |         |         |  |     |
| 0                                                                                                  | 16.2    | 16.2    |     | 18.7    | 26.7    |  |     |
| 1-3                                                                                                | 36.6    | 48.6    |     | 56.1    | 40.0    |  |     |
| >3                                                                                                 | 47.1    | 35.1    | .34 | 25.2    | 33.3    |  | .50 |
| <b>Sexual behaviors in the last three months</b>                                                   |         |         |     |         |         |  |     |
| Anal intercourse with regular male sex partner(s) (RP)                                             |         |         |     |         |         |  |     |
| No                                                                                                 | 26.7    | 21.6    |     | 37.4    | 33.3    |  |     |
| Yes                                                                                                | 73.3    | 78.4    | .52 | 61.7    | 66.7    |  | .74 |
| Anal intercourse with non-regular male sex partner(s) (NRP)                                        |         |         |     |         |         |  |     |
| No                                                                                                 | 54.5    | 70.3    |     | 49.5    | 53.3    |  |     |
| Yes                                                                                                | 45.5    | 29.7    | .08 | 49.5    | 46.7    |  | .81 |
| Condomless anal intercourse (CAI) with men                                                         |         |         |     |         |         |  |     |
| No                                                                                                 | 57.6    | 54.1    |     | 52.3    | 40.0    |  |     |
| Yes                                                                                                | 34.6    | 35.1    | .84 | 33.6    | 53.3    |  | .20 |
| Multiple male sex partnerships                                                                     |         |         |     |         |         |  |     |
| No                                                                                                 | 56.5    | 73.0    |     | 50.5    | 53.3    |  |     |
| Yes                                                                                                | 43.5    | 27.0    | .06 | 49.5    | 46.7    |  | .84 |
| Illicit drug use before/during anal intercourse with men (sexualized drug use)                     |         |         |     |         |         |  |     |
| No                                                                                                 | 96.9    | 94.6    |     | 97.2    | 93.3    |  |     |
| Yes                                                                                                | 3.1     | 5.4     | .49 | 2.8     | 6.7     |  | .43 |
| <b>Perceptions related to HIV testing</b>                                                          |         |         |     |         |         |  |     |
| Behavioral intention to use free HIVST with real-time counseling services in the coming six months |         |         |     |         |         |  |     |
| Unlikely/neutral                                                                                   | 26.2    | 27.0    |     | 22.4    | 40.0    |  |     |
| Likely                                                                                             | 73.8    | 73.0    | .92 | 77.6    | 60.0    |  | .14 |
| <b>Perceived logistical benefits of HIVST (% agree/strongly agree)</b>                             |         |         |     |         |         |  |     |
| HIVST is easy for you to use                                                                       | 76.3    | 62.2    |     | 83.2    | 53.3    |  |     |
| HIVST is convenient for you                                                                        | 82.7    | 75.7    |     | 86.0    | 66.7    |  |     |
| <i>Perceived Logistical Benefit Scale (Mean/SD)</i>                                                | 8.0/1.4 | 7.4/1.7 | .02 | 8.5/1.8 | 7.5/1.8 |  | .05 |

**Perceived psychological benefits of HIVST (% agree/strongly agree)**

|                                                                    |          |          |     |          |          |     |
|--------------------------------------------------------------------|----------|----------|-----|----------|----------|-----|
| Using HIVST could reduce embarrassment                             | 77.5     | 78.4     |     | 83.2     | 73.3     |     |
| Using HIVST could avoid you being stigmatized by service providers | 42.4     | 43.2     |     | 63.6     | 66.7     |     |
| Using HIVST could protect your privacy                             | 81.2     | 86.5     |     | 87.9     | 86.7     |     |
| <i>Perceived Psychological Benefit Scale (Mean/SD)</i>             | 11.0/2.6 | 10.9/2.5 | .84 | 12.4/2.4 | 12.2/2.1 | .71 |

**Perceived logistical barriers of HIVST (% agree/strongly agree)**

|                                                     |          |          |     |          |          |     |
|-----------------------------------------------------|----------|----------|-----|----------|----------|-----|
| HIVST is expensive for you                          | 62.8     | 43.2     |     | 51.4     | 60.0     |     |
| It is difficult for you to buy a HIVST kit          | 51.8     | 51.4     |     | 60.7     | 40.0     |     |
| You do not know how to choose a reliable HIVST kit  | 68.6     | 73.0     |     | 72.0     | 66.7     |     |
| You concern about the accuracy of HIVST             | 57.6     | 59.5     |     | 45.8     | 40.0     |     |
| <i>Perceived Logistical Barrier Scale (Mean/SD)</i> | 13.9/3.1 | 13.8/3.5 | .80 | 14.3/3.2 | 13.9/2.9 | .64 |

**Perceived psychological barrier of HIVST (% agree/strongly agree)**

|                                                                                        |         |          |     |          |          |     |
|----------------------------------------------------------------------------------------|---------|----------|-----|----------|----------|-----|
| You are not psychologically prepared to perform HIVST                                  | 10.5    | 24.3     |     | 23.4     | 26.7     |     |
| You concern about not understanding the HIVST results                                  | 13.6    | 10.8     |     | 12.1     | 20.0     |     |
| You cannot receive immediate psychological support if you have a positive HIVST result | 36.1    | 29.7     |     | 50.5     | 46.7     |     |
| You cannot access HIV treatment and care services if you have a positive HIVST result  | 26.2    | 43.2     |     | 31.8     | 33.3     |     |
| <i>Perceived Psychological Barrier Scale (Mean/SD)</i>                                 | 9.9/3.2 | 10.4/2.8 | .42 | 11.6/2.6 | 12.3/3.1 | .34 |

**Cue to action related to HIVST (% agree/strongly agree)**

|                                                 |         |         |     |         |         |     |
|-------------------------------------------------|---------|---------|-----|---------|---------|-----|
| Significant others will support you to do HIVST | 71.2    | 54.1    |     | 73.8    | 73.3    |     |
| Male sex partner will support you to do HIVST   | 81.2    | 70.3    |     | 77.6    | 80.0    |     |
| <i>Cue to Action Scale (Mean/SD)</i>            | 7.8/1.5 | 7.5/1.6 | .20 | 8.1/1.9 | 8.1/1.4 | .99 |

**Perceived self-efficacy related to HIVST (% agree/strongly agree)**

|                                                                                           |          |          |     |          |          |     |
|-------------------------------------------------------------------------------------------|----------|----------|-----|----------|----------|-----|
| You are confident to obtain a high-quality HIVST kit                                      | 42.4     | 27.0     |     | 31.8     | 53.3     |     |
| You are confident to use HIVST kits properly                                              | 74.9     | 67.6     |     | 76.6     | 66.7     |     |
| You are confident to understand the HIVST results                                         | 80.1     | 75.7     |     | 76.6     | 80.0     |     |
| You are confident to receive confirmatory testing after obtaining a positive HIVST result | 80.6     | 81.1     |     | 73.8     | 73.3     |     |
| <i>Perceived Self-efficacy Scale (Mean/SD)</i>                                            | 14.9/2.4 | 14.1/2.7 | .06 | 14.9/2.4 | 15.1/2.8 | .71 |

**Perceived importance of real-time counseling service supporting HIVST users**

|                                          |      |      |     |      |      |     |
|------------------------------------------|------|------|-----|------|------|-----|
| Very unimportant/<br>unimportant/neutral | 38.7 | 37.8 |     | 27.1 | 60.0 |     |
| Important/very important                 | 61.3 | 62.2 | .92 | 72.9 | 40.0 | .01 |

---

**Table S2. Comparing baseline characteristics of participants who declined HIVST-online and completed HIVST-online at Month 6 follow-up.**

|                                                                | Those who<br>declined<br>HIVST-Online<br>(n = 143)<br>% | Those who<br>completed<br>HIVST-Online<br>(n = 155)<br>% | p-Value |
|----------------------------------------------------------------|---------------------------------------------------------|----------------------------------------------------------|---------|
| Socio-demographic characteristics                              |                                                         |                                                          |         |
| Age group (years)                                              |                                                         |                                                          |         |
| 18–30                                                          | 58.7                                                    | 55.5                                                     |         |
| 31–40                                                          | 28.0                                                    | 33.5                                                     |         |
| >40                                                            | 13.3                                                    | 11.0                                                     | 0.54    |
| Marital/cohabitation status                                    |                                                         |                                                          |         |
| Currently single                                               | 81.1                                                    | 86.5                                                     |         |
| Cohabitate/married with a man                                  | 18.2                                                    | 13.5                                                     |         |
| Cohabited/married with a woman                                 | 0.7                                                     | 0                                                        | 0.24    |
| Highest education level attained                               |                                                         |                                                          |         |
| Secondary or below                                             | 11.2                                                    | 15.5                                                     |         |
| College or above                                               | 88.8                                                    | 84.5                                                     | 0.28    |
| Current employment status                                      |                                                         |                                                          |         |
| Full-time                                                      | 84.6                                                    | 86.5                                                     |         |
| Part-time/unemployed/retired/student                           | 15.4                                                    | 13.5                                                     | 0.65    |
| Sexual orientation                                             |                                                         |                                                          |         |
| Gay                                                            | 90.9                                                    | 95.5                                                     |         |
| Bisexual                                                       | 8.4                                                     | 3.9                                                      |         |
| Heterosexual                                                   | 0.7                                                     | 0.6                                                      | 0.21    |
| History of sexually transmitted infection                      |                                                         |                                                          |         |
| No                                                             | 76.8                                                    | 80.6                                                     |         |
| Yes                                                            | 23.2                                                    | 19.4                                                     | 0.41    |
| HIV testing history                                            |                                                         |                                                          |         |
| No. of HIV testing in past 3 years in addition to HIVST-online |                                                         |                                                          |         |
| 0                                                              | 16.8                                                    | 17.5                                                     |         |
| 1–3                                                            | 44.8                                                    | 42.9                                                     |         |
| >3                                                             | 38.5                                                    | 39.6                                                     | 0.95    |
| Sexual behaviors in the last three months                      |                                                         |                                                          |         |
| Anal intercourse with regular male sex partner(s) (RP)         |                                                         |                                                          |         |
| No                                                             | 28.7                                                    | 32.9                                                     |         |
| Yes                                                            | 71.3                                                    | 67.1                                                     | 0.43    |
| Anal intercourse with non-regular male sex partner(s) (NRP)    |                                                         |                                                          |         |
| No                                                             | 56.6                                                    | 49.0                                                     |         |
| Yes                                                            | 42.7                                                    | 51.0                                                     | 0.43    |
| Condomless anal intercourse (CAI) with men                     |                                                         |                                                          |         |
| No                                                             | 56.6                                                    | 54.8                                                     |         |
| Yes                                                            | 32.2                                                    | 36.1                                                     | 0.56    |
| Multiple male sex partnerships                                 |                                                         |                                                          |         |
| No                                                             | 57.3                                                    | 51.6                                                     |         |
| Yes                                                            | 42.7                                                    | 48.4                                                     | 0.32    |
| Illicit drug use before/during anal intercourse with men       |                                                         |                                                          |         |
| No                                                             | 97.9                                                    | 96.1                                                     |         |
| Yes                                                            | 2.1                                                     | 3.9                                                      | 0.50    |
| Perceptions related to HIV testing                             |                                                         |                                                          |         |

|                                                                                                    |          |          |      |
|----------------------------------------------------------------------------------------------------|----------|----------|------|
| Behavioral intention to use free HIVST with real-time counseling services in the coming six months |          |          |      |
| Unlikely/neutral                                                                                   | 30.8     | 19.4     |      |
| Likely                                                                                             | 69.2     | 80.6     | 0.02 |
| Perceived logistical benefits of HIVST (% agree/strongly agree)                                    |          |          |      |
| HIVST is easy for you to use                                                                       | 82.4     | 76.1     |      |
| HIVST is convenient for you                                                                        | 84.6     | 83.2     |      |
| Perceived Logistical Benefit Scale <sup>1</sup> (Mean/SD)                                          | 8.2/1.5  | 8.2/1.7  | 0.70 |
| Perceived psychological benefits of HIVST (% agree/strongly agree)                                 |          |          |      |
| Using HIVST could reduce embarrassment                                                             | 79.7     | 79.4     |      |
| Using HIVST could avoid being stigmatized by service providers                                     | 50.3     | 49.7     |      |
| Using HIVST could protect your privacy                                                             | 83.9     | 83.2     |      |
| Perceived Psychological Benefit Scale <sup>2</sup> (Mean/SD)                                       | 11.5/2.6 | 11.5/2.7 | 0.98 |
| Perceived logistical barriers of HIVST (% agree/strongly agree)                                    |          |          |      |
| HIVST is expensive for you                                                                         | 60.8     | 56.8     |      |
| It is difficult for you to buy a HIVST kit                                                         | 52.4     | 57.4     |      |
| You do not know how to choose a reliable HIVST kit                                                 | 67.1     | 72.3     |      |
| You concern about the accuracy of HIVST                                                            | 49.0     | 57.4     |      |
| Perceived Logistical Barrier Scale <sup>3</sup> (Mean/SD)                                          | 13.9/3.3 | 14.1/3.0 | .59  |
| Perceived psychological barrier of HIVST (% agree/ strongly agree)                                 |          |          |      |
| You are not psychologically prepared to perform HIVST                                              | 18.2     | 18.8     |      |
| You concern about not understanding the HIVST results                                              | 13.3     | 12.9     |      |
| You cannot receive immediate psychological support if you have a positive HIVST result             | 40.6     | 41.9     |      |
| You cannot access HIV treatment and care services if you have positive HIVST result                | 28.2     | 28.4     |      |
| Perceived Psychological Barrier Scale <sup>4</sup> (Mean/SD)                                       | 10.5/3.1 | 10.5/3.0 | 0.87 |
| Cue to action related to HIVST (% agree/strongly agree)                                            |          |          |      |
| Significant others will support you to do HIVST                                                    | 74.1     | 70.3     |      |
| Male sex partner will support you to do HIVST                                                      | 82.4     | 78.1     |      |
| Cue to Action Scale <sup>5</sup> (Mean/SD)                                                         | 8.0/1.6  | 7.9/1.7  | 0.78 |
| Perceived self-efficacy related to HIVST (% agree/strongly agree)                                  |          |          |      |
| You are confident to obtain a high-quality HIVST kit                                               | 42.0     | 35.5     |      |
| You are confident to use HIVST kits properly                                                       | 74.1     | 76.1     |      |

|                                                                                           |          |          |      |
|-------------------------------------------------------------------------------------------|----------|----------|------|
| You are confident to understand the HIVST results                                         | 79.7     | 78.1     |      |
| You are confident to receive confirmatory testing after obtaining a positive HIVST result | 79.0     | 77.4     |      |
| Perceived Self-efficacy Scale <sup>6</sup> (Mean/SD)                                      | 14.9/2.5 | 15.0/2.2 | 0.70 |
| <hr/>                                                                                     |          |          |      |
| Perceived importance of real-time counseling service supporting HIVST users               |          |          |      |
| Very unimportant/unimportant/neutral                                                      | 39.2     | 30.3     |      |
| Important/very important                                                                  | 60.8     | 69.7     | 0.12 |
| <hr/>                                                                                     |          |          |      |
